# Supplementary material for: Reactive CO 2 capture and mineralization of magnesium hydroxide to produce hydromagnesite with inherent solvent regeneration
Source: Royal Society of Chemistry journal article supplement (doi:10.1039/d4im00157e), 2025-01-01
Supplement: d4im00157e1.pdf [file d4im00157e1.pdf]

## Supplementary Materials

# Reactive CO<sub>2</sub> Capture and Mineralization of Magnesium Hydroxide to Produce Hydromagnesite with Inherent Solvent Regeneration

Xun Gao,<sup>1</sup> Peilong Lu<sup>1</sup>, Ivan Kuzmenko,<sup>2</sup> Jan Ilavsky,<sup>2</sup> and Greeshma Gadikota<sup>1,3\*</sup>

<sup>1</sup>School of Civil and Environmental Engineering, Cornell University, Ithaca, NY 14853

<sup>2</sup>Advanced Photon Source, Argonne National Laboratory, Lemont, IL 60439

<sup>3</sup>Smith School of Chemical and Biological Engineering, Cornell University, Ithaca, NY 14853

\* Corresponding Author. Phone: +1 607-255-4796. E-mail: [gg464@cornell.edu](mailto:gg464@cornell.edu)

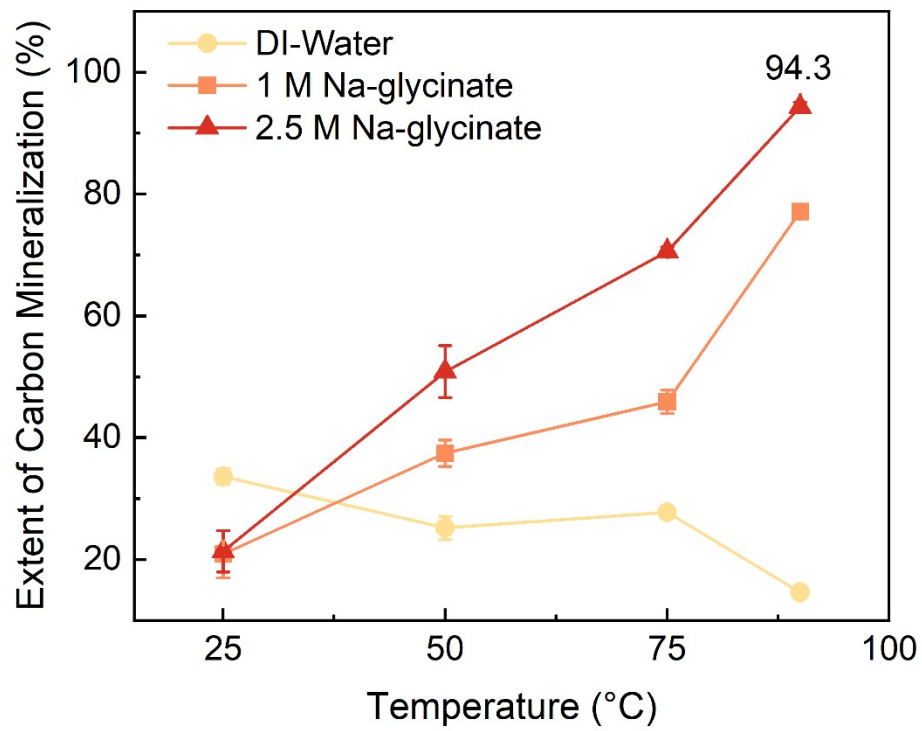

**Figure S1.** The normalized carbon mineralization extent of  $\text{Mg}(\text{OH})_2$  with pure  $\text{CO}_2$  determined by Thermogravimetric Analysis (TGA).

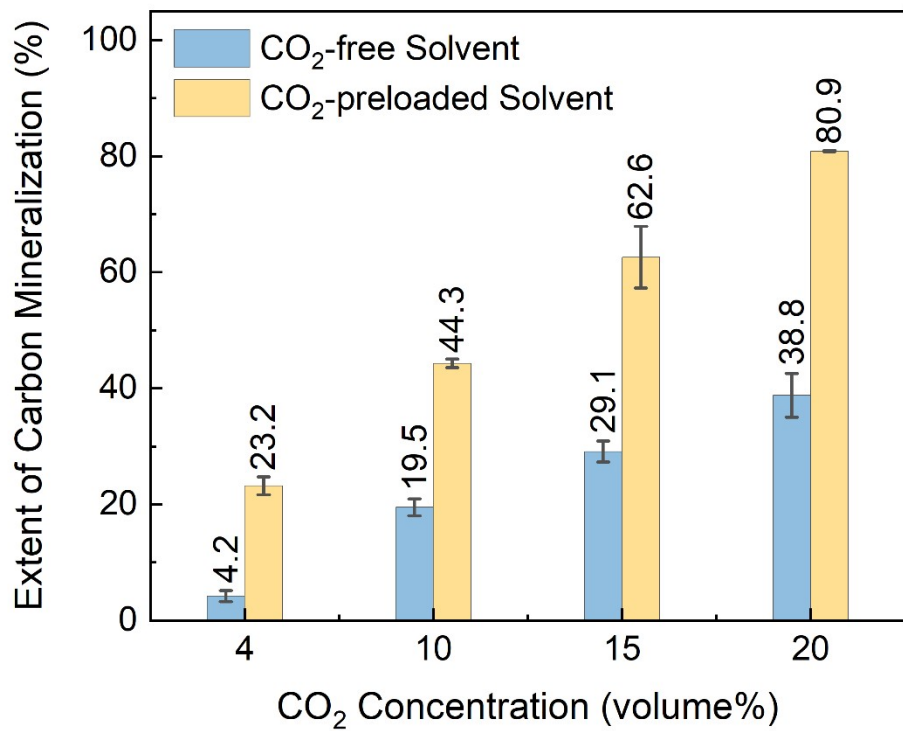

**Figure S2.** The normalized carbon mineralization extent of Mg(OH)<sub>2</sub> with binary flue gas determined by Thermogravimetric Analysis (TGA)

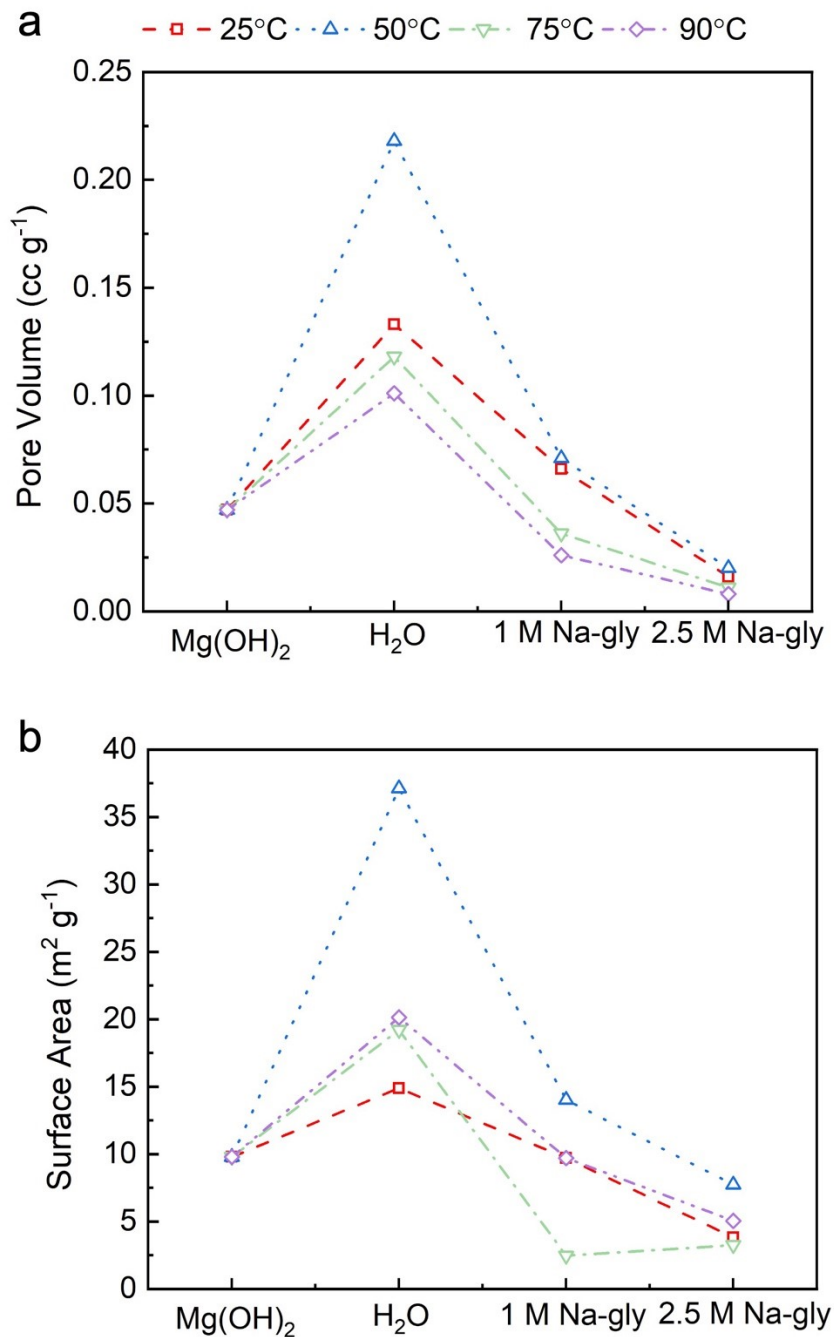

**Figure S3.** (a) Pore volume distributions and (b) surface area of the products obtained after carbon mineralization as determined using the N<sub>2</sub> adsorption - Barrett, Joyner, Halenda (BJH) method.
